# Supplementary material for: Network motif frequency vectors reveal evolving metabolic network organisation
Source: Royal Society of Chemistry journal article supplement (doi:10.1039/c4mb00430b), 2014-10-02
Supplement: c4mb00430b2.xlsx [file c4mb00430b2.xlsx]

## Sheet: Habitat data
n.b. The full names of each organism can be found on the KEGG database:					http://www.genome.jp/kegg/catalog/org_list.html
Name	#Nodes	#Edges	Habitat Variability
mle	448	604	Obligate
mga	125	147	Obligate
mge	120	139	Obligate
mpe	187	221	Obligate
mpu	146	178	Obligate
sag	417	579	Obligate
san	423	587	Obligate
spg	401	540	Obligate
spm	401	541	Obligate
sps	401	539	Obligate
spy	394	519	Obligate
uur	78	91	Obligate
rba	525	730	Obligate
bpa	620	840	Obligate
bpe	595	805	Obligate
xfa	491	652	Obligate
xft	492	653	Obligate
bab	263	318	Obligate
bas	265	327	Obligate
bfl	355	458	Obligate
buc	280	352	Obligate
cca	266	322	Obligate
cmu	245	297	Obligate
cpa	246	300	Obligate
cpj	248	303	Obligate
cpn	248	302	Obligate
ctr	246	301	Obligate
mpn	97	113	Obligate
rco	218	267	Obligate
rpr	213	258	Obligate
tpa	173	216	Obligate
twh	295	365	Obligate
tws	295	365	Obligate
wbr	326	415	Obligate
tte	480	641	Specialised
cte	487	645	Specialised
aae	442	566	Specialised
tma	448	612	Specialised
tel	541	692	Specialised
ccr	647	868	Aquatic
pma	541	700	Aquatic
syn	583	749	Aquatic
syw	576	753	Aquatic
fnu	477	619	Facultative
blo	418	568	Facultative
mbo	676	923	Facultative
mtc	660	902	Facultative
mtu	671	918	Facultative
bth	557	766	Facultative
lpl	498	678	Facultative
sam	601	806	Facultative
sau	601	806	Facultative
sav	601	807	Facultative
sep	558	763	Facultative
smu	481	644	Facultative
spn	490	661	Facultative
spr	499	672	Facultative
bbr	652	890	Facultative
bja	783	1060	Facultative
bme	679	913	Facultative
bms	644	866	Facultative
ecc	768	1129	Facultative
ece	776	1139	Facultative
ecj	787	1147	Facultative
eco	785	1145	Facultative
ecs	773	1135	Facultative
hhe	452	586	Facultative
hin	505	693	Facultative
hpj	393	511	Facultative
hpy	419	543	Facultative
nma	513	687	Facultative
nme	515	686	Facultative
pmu	563	791	Facultative
sfl	730	1062	Facultative
sfx	728	1063	Facultative
stm	809	1160	Facultative
stt	768	1110	Facultative
sty	766	1107	Facultative
vch	677	978	Facultative
vpa	709	1022	Facultative
vvu	715	1026	Facultative
xac	723	980	Facultative
xcc	722	980	Facultative
bbu	90	101	Facultative
lil	579	748	Facultative
cef	565	761	Multiple
cgl	565	761	Multiple
sco	737	1009	Multiple
sma	784	1089	Multiple
ana	605	800	Multiple
bha	669	923	Multiple
cac	551	755	Multiple
cpe	502	676	Multiple
ctc	480	628	Multiple
efa	454	603	Multiple
lin	542	742	Multiple
lla	487	654	Multiple
lmo	562	768	Multiple
oih	625	841	Multiple
atu	745	1031	Multiple
cbu	430	560	Multiple
cje	439	569	Multiple
mlo	798	1111	Multiple
neu	524	701	Multiple
pae	766	1057	Multiple
ppu	745	1008	Multiple
pst	741	1020	Multiple
rso	750	1032	Multiple
sme	800	1119	Multiple
son	653	933	Multiple
ype	714	1011	Multiple
ypk	718	1021	Multiple
dra	557	779	Terrestrial
bce	693	966	Terrestrial
bsu	686	944	Terrestrial

## Sheet: Oxygen requirements data
n.b. The full names of each organism can be found on the KEGG database:					http://www.genome.jp/kegg/catalog/org_list.html
Name	#Nodes	#Edges	Oxygen Requirements
mle	448	604	Aerobic
rba	525	730	Aerobic
bpa	620	840	Aerobic
bpe	595	805	Aerobic
xfa	491	652	Aerobic
xft	492	653	Aerobic
aae	442	566	Aerobic
ccr	647	868	Aerobic
mbo	676	923	Aerobic
mtc	660	902	Aerobic
mtu	671	918	Aerobic
bbr	652	890	Aerobic
bja	783	1060	Aerobic
bme	679	913	Aerobic
bms	644	866	Aerobic
hhe	452	586	Aerobic
hpj	393	511	Aerobic
hpy	419	543	Aerobic
nma	513	687	Aerobic
nme	515	686	Aerobic
xac	723	980	Aerobic
xcc	722	980	Aerobic
bbu	90	101	Aerobic
lil	579	748	Aerobic
sco	737	1009	Aerobic
sma	784	1089	Aerobic
ana	605	800	Aerobic
oih	625	841	Aerobic
atu	745	1031	Aerobic
cje	439	569	Aerobic
mlo	798	1111	Aerobic
neu	524	701	Aerobic
pae	766	1057	Aerobic
ppu	745	1008	Aerobic
pst	741	1020	Aerobic
rso	750	1032	Aerobic
sme	800	1119	Aerobic
dra	557	779	Aerobic
bce	693	966	Aerobic
aau	690	956	Aerobic
ace	489	641	Aerobic
cdi	517	702	Aerobic
cmi	577	792	Aerobic
fra	601	806	Aerobic
lxx	464	616	Aerobic
mav	695	946	Aerobic
mbb	676	923	Aerobic
mpa	672	918	Aerobic
msm	784	1068	Aerobic
mtf	626	860	Aerobic
mul	666	910	Aerobic
nca	651	916	Aerobic
nfa	672	910	Aerobic
rha	843	1159	Aerobic
rxy	642	847	Aerobic
sen	825	1126	Aerobic
tfu	592	801	Aerobic
chu	560	730	Aerobic
fps	530	703	Aerobic
gfo	630	834	Aerobic
sru	550	737	Aerobic
dge	604	854	Aerobic
tth	582	798	Aerobic
ttj	593	806	Aerobic
ayw	65	74	Aerobic
bay	675	944	Aerobic
bcz	726	1020	Aerobic
bpu	651	905	Aerobic
gka	677	933	Aerobic
poy	75	86	Aerobic
ssp	600	807	Aerobic
sth	528	721	Aerobic
aav	669	901	Aerobic
abo	610	807	Aerobic
abu	481	633	Aerobic
aci	663	898	Aerobic
acr	644	893	Aerobic
ajs	630	841	Aerobic
aph	255	315	Aerobic
azo	739	974	Aerobic
bba	482	645	Aerobic
bbk	345	444	Aerobic
bbt	817	1101	Aerobic
bhe	373	488	Aerobic
bpd	839	1140	Aerobic
bpl	852	1161	Aerobic
bpm	862	1180	Aerobic
bps	846	1154	Aerobic
bqu	343	443	Aerobic
bte	842	1153	Aerobic
btr	392	510	Aerobic
bxe	892	1210	Aerobic
cco	391	498	Aerobic
ccv	432	559	Aerobic
cjd	444	571	Aerobic
cjj	450	582	Aerobic
cjr	436	565	Aerobic
cju	440	569	Aerobic
fta	486	646	Aerobic
ftf	503	663	Aerobic
fth	480	634	Aerobic
ftl	511	671	Aerobic
ftn	524	696	Aerobic
ftw	504	669	Aerobic
gox	550	735	Aerobic
gur	561	750	Aerobic
hac	409	531	Aerobic
hne	585	785	Aerobic
hpa	427	553	Aerobic
ilo	582	812	Aerobic
jan	677	945	Aerobic
lpf	549	739	Aerobic
lpn	560	754	Aerobic
lpp	560	753	Aerobic
mag	600	807	Aerobic
mca	548	753	Aerobic
mfa	503	660	Aerobic
mmw	756	1031	Aerobic
mxa	629	877	Aerobic
ngo	470	632	Aerobic
nha	567	789	Aerobic
nmc	504	673	Aerobic
nmu	535	712	Aerobic
pat	747	1028	Aerobic
pau	767	1059	Aerobic
pde	716	1016	Aerobic
pfl	806	1113	Aerobic
pfo	763	1044	Aerobic
pha	677	955	Aerobic
pla	607	814	Aerobic
pna	717	964	Aerobic
pnu	493	665	Aerobic
pol	725	977	Aerobic
ppf	764	1038	Aerobic
prw	570	775	Aerobic
psb	731	1008	Aerobic
psp	765	1042	Aerobic
pub	462	601	Aerobic
ret	794	1117	Aerobic
rle	814	1150	Aerobic
rrj	218	270	Aerobic
scl	698	948	Aerobic
sde	614	810	Aerobic
sgl	535	750	Aerobic
swi	650	880	Aerobic
wsu	451	594	Aerobic
xcb	724	982	Aerobic
xcv	723	984	Aerobic
xom	671	914	Aerobic
xoo	658	889	Aerobic
baf	90	104	Aerobic
lbj	507	653	Aerobic
lbl	508	655	Aerobic
lic	556	708	Aerobic
mga	125	147	Facultative
mge	120	139	Facultative
mpe	187	221	Facultative
mpu	146	178	Facultative
sag	417	579	Facultative
san	423	587	Facultative
spg	401	540	Facultative
spm	401	541	Facultative
sps	401	539	Facultative
spy	394	519	Facultative
uur	78	91	Facultative
lpl	498	678	Facultative
sam	601	806	Facultative
sau	601	806	Facultative
sav	601	807	Facultative
sep	558	763	Facultative
smu	481	644	Facultative
spn	490	661	Facultative
spr	499	672	Facultative
ecc	768	1129	Facultative
ece	776	1139	Facultative
ecj	787	1147	Facultative
eco	785	1145	Facultative
ecs	773	1135	Facultative
hin	505	693	Facultative
pmu	563	791	Facultative
sfl	730	1062	Facultative
sfx	728	1063	Facultative
stm	809	1160	Facultative
stt	768	1110	Facultative
sty	766	1107	Facultative
vch	677	978	Facultative
vpa	709	1022	Facultative
vvu	715	1026	Facultative
cef	565	761	Facultative
cgl	565	761	Facultative
bha	669	923	Facultative
efa	454	603	Facultative
lin	542	742	Facultative
lla	487	654	Facultative
lmo	562	768	Facultative
cbu	430	560	Facultative
son	653	933	Facultative
ype	714	1011	Facultative
ypk	718	1021	Facultative
bsu	686	944	Facultative
cgb	567	760	Facultative
cjk	459	645	Facultative
rsa	597	827	Facultative
cya	545	706	Facultative
cyb	553	722	Facultative
ban	680	956	Facultative
bar	689	969	Facultative
bat	682	960	Facultative
bld	714	987	Facultative
bli	691	963	Facultative
btk	699	984	Facultative
btl	721	1009	Facultative
lac	312	415	Facultative
lbr	400	527	Facultative
lbu	324	410	Facultative
lca	460	616	Facultative
ldb	315	404	Facultative
lga	307	388	Facultative
ljo	305	393	Facultative
llc	491	654	Facultative
llm	507	692	Facultative
lme	461	604	Facultative
lmf	557	765	Facultative
lsa	396	521	Facultative
lsl	413	552	Facultative
lwe	540	747	Facultative
mcp	167	193	Facultative
mfl	161	198	Facultative
mhj	116	138	Facultative
mhp	116	140	Facultative
mhy	113	137	Facultative
mmo	172	216	Facultative
mmy	199	232	Facultative
ooe	352	438	Facultative
ppe	362	452	Facultative
saa	618	827	Facultative
sab	602	833	Facultative
sac	589	792	Facultative
sah	585	794	Facultative
saj	588	797	Facultative
sak	458	636	Facultative
sao	591	784	Facultative
sar	595	797	Facultative
sas	588	791	Facultative
sax	572	764	Facultative
ser	560	763	Facultative
sgo	481	648	Facultative
sha	549	747	Facultative
spa	420	568	Facultative
spb	431	579	Facultative
spd	494	668	Facultative
spf	404	534	Facultative
sph	428	577	Facultative
spi	429	578	Facultative
spj	423	570	Facultative
spk	420	565	Facultative
spz	432	581	Facultative
ssa	540	734	Facultative
ssu	461	640	Facultative
ste	424	568	Facultative
cph	502	669	Facultative
ade	603	837	Facultative
aha	728	1056	Facultative
apl	589	803	Facultative
bam	816	1111	Facultative
bmb	612	822	Facultative
bmf	673	899	Facultative
bov	639	858	Facultative
cps	687	967	Facultative
csa	656	912	Facultative
cvi	710	1000	Facultative
eba	620	840	Facultative
eca	754	1101	Facultative
eci	786	1149	Facultative
ecp	772	1136	Facultative
ecv	784	1150	Facultative
ecw	783	1147	Facultative
ecx	793	1155	Facultative
hch	709	992	Facultative
hip	473	653	Facultative
hiq	453	608	Facultative
hit	488	679	Facultative
hso	507	695	Facultative
lip	350	440	Facultative
maq	646	876	Facultative
mmr	574	775	Facultative
mpt	659	889	Facultative
nwi	531	729	Facultative
plu	737	1065	Facultative
ppr	730	1050	Facultative
reh	808	1117	Facultative
reu	780	1066	Facultative
rfr	691	952	Facultative
rme	734	1009	Facultative
rpa	718	974	Facultative
rpb	681	922	Facultative
rpc	645	894	Facultative
rpd	677	917	Facultative
rpe	691	942	Facultative
rru	666	934	Facultative
rsh	676	953	Facultative
rsp	732	1029	Facultative
rsq	664	948	Facultative
saz	683	986	Facultative
sbl	665	958	Facultative
sbm	672	969	Facultative
sbo	726	1046	Facultative
sdn	643	926	Facultative
sdy	692	1010	Facultative
sec	779	1123	Facultative
sfr	664	952	Facultative
sfv	745	1087	Facultative
she	662	950	Facultative
shm	661	949	Facultative
shn	673	965	Facultative
shw	658	941	Facultative
slo	668	971	Facultative
spc	655	938	Facultative
spe	794	1168	Facultative
spt	774	1117	Facultative
sse	672	975	Facultative
ssn	770	1118	Facultative
sun	466	615	Facultative
tbd	516	699	Facultative
vco	688	996	Facultative
vvy	737	1054	Facultative
xau	663	895	Facultative
ypa	752	1074	Facultative
ypg	706	1004	Facultative
ypi	753	1081	Facultative
ypm	728	1039	Facultative
ypn	747	1064	Facultative
ypp	757	1080	Facultative
yps	776	1108	Facultative
tte	480	641	Anaerobic
cte	487	645	Anaerobic
tma	448	612	Anaerobic
fnu	477	619	Anaerobic
blo	418	568	Anaerobic
bth	557	766	Anaerobic
cac	551	755	Anaerobic
cpe	502	676	Anaerobic
ctc	480	628	Anaerobic
bad	419	562	Anaerobic
pac	527	708	Anaerobic
bfs	567	773	Anaerobic
pgi	405	524	Anaerobic
cbf	513	695	Anaerobic
cbo	511	696	Anaerobic
cdf	556	737	Anaerobic
chy	477	624	Anaerobic
cpf	514	696	Anaerobic
cpr	481	645	Anaerobic
drm	527	684	Anaerobic
dsy	571	784	Anaerobic
mta	472	625	Anaerobic
stc	428	579	Anaerobic
stl	428	579	Anaerobic
cau	649	877	Anaerobic
deh	316	395	Anaerobic
det	307	381	Anaerobic
cch	471	626	Anaerobic
plt	482	648	Anaerobic
tle	429	578	Anaerobic
bpt	661	904	Anaerobic
cha	423	547	Anaerobic
dde	543	726	Anaerobic
dno	360	470	Anaerobic
dps	513	680	Anaerobic
dvu	509	676	Anaerobic
gme	544	727	Anaerobic
gsu	508	675	Anaerobic
har	581	777	Anaerobic
hdu	383	527	Anaerobic
msu	558	789	Anaerobic
nis	436	582	Anaerobic
pca	534	729	Anaerobic
pin	681	969	Anaerobic
ppd	509	673	Anaerobic
sat	492	628	Anaerobic
tcx	488	645	Anaerobic
zmo	479	625	Anaerobic
tde	354	432	Anaerobic
